# Supplementary material for: Adaptive Evolution of RH5 in Ape Plasmodium species of the Laverania Subgenus
Source: PubMed Central journal article supplement (PMC5784257; doi:10.1128/mbio.02237-17), 2018-01-23
Supplement: mbo001183680st1.pdf [file mbo001183680st1.pdf]

**TABLE S1** Description of *Rh5* gene sequences analyzed

| Sample name            | Species                  | Accession/ID <sup>a</sup> | Source                                     | Length (bp) | Alignment <sup>b</sup> |
|------------------------|--------------------------|---------------------------|--------------------------------------------|-------------|------------------------|
| BQggg60_RH5_SGA6.11    | <i>P. adleri</i>         | KT824390                  | published SGA sequence                     | 827         | n/a                    |
| BQggg61_RH5_SGA6.11    | <i>P. adleri</i>         | (KT824390)                | published SGA sequence                     | 827         | n/a                    |
| EKggg1182_FB_SGA8.8    | <i>P. adleri</i>         | KT824396                  | updated SGA sequence                       | 1253        | long                   |
| NDggg3120_RH5_SGA6.11  | <i>P. adleri</i>         | (KT824390)                | published SGA sequence                     | 827         | n/a                    |
| SAGgg3066_FA_SGA30.G10 | <i>P. adleri</i>         | MF356539                  | new SGA sequence                           | 1349        | n/a                    |
| SAGgg3066_FA_SGA30.G8  | <i>P. adleri</i>         | MF356538                  | new SGA sequence                           | 1349        | n/a                    |
| SAGgg3066_FB_SGA30.F4  | <i>P. adleri</i>         | MF356542                  | new SGA sequence                           | 1253        | long                   |
| SAGgg3066_FL_SGA100.3  | <i>P. adleri</i>         | MF356541                  | new SGA sequence                           | 1773        | long                   |
| SAGgg3066_FL_SGA30.F3  | <i>P. adleri</i>         | MF356540                  | new SGA sequence                           | 1814        | long, 1ps              |
| SAGgg3157_RH5_SGA100.1 | <i>P. adleri</i>         | MF356543                  | new SGA sequence                           | 827         | n/a                    |
| GTptt503_RH5_SGA5.6    | <i>P. billcollinsi</i>   | KT824404                  | published SGA sequence                     | 833         | n/a                    |
| SYptt20_FB_SGA5.1      | <i>P. billcollinsi</i>   | KT824413                  | updated SGA sequence                       | 1371        | n/a                    |
| SYptt20_FL_SGA         | <i>P. billcollinsi</i>   | MF356544                  | updated SGA sequence with new accession    | 1726        | long, 1ps              |
| GTggg119_RH5_SGA10.3   | <i>P. blacklocki</i>     | KT824399                  | published SGA sequence                     | 830         | 1ps                    |
| Pf_7G8                 | <i>P. falciparum</i>     | EU433391                  | published SGA sequence                     | 1581        | long                   |
| Pf_FCH                 | <i>P. falciparum</i>     | KI927815                  | RH5 exon 2 extracted from published contig | 1517        | long                   |
| Pf_FVO                 | <i>P. falciparum</i>     | KI925024                  | RH5 exon 2 extracted from published contig | 1517        | long                   |
| Pf_Malaysia            | <i>P. falciparum</i>     | KI927479                  | RH5 exon 2 extracted from published contig | 1517        | long                   |
| Pf_Mali                | <i>P. falciparum</i>     | KI925502                  | RH5 exon 2 extracted from published contig | 1517        | long                   |
| Pf_NF54                | <i>P. falciparum</i>     | KE123747                  | RH5 exon 2 extracted from published contig | 1517        | long                   |
| Pf_PaloAlto            | <i>P. falciparum</i>     | KI927255                  | RH5 exon 2 extracted from published contig | 1517        | long                   |
| Pf_SLucia              | <i>P. falciparum</i>     | KE123478                  | RH5 exon 2 extracted from published contig | 1517        | long                   |
| Pf_Tanzania            | <i>P. falciparum</i>     | KI926311                  | RH5 exon 2 extracted from published contig | 1517        | long                   |
| Pf_UGT5.1              | <i>P. falciparum</i>     | KE124438                  | RH5 exon 2 extracted from published contig | 1517        | long                   |
| Pf3D7                  | <i>P. falciparum</i>     | PF3D7_0424100             | published genome                           | 1581        | long, 1ps              |
| GTptt314_RH5_SGA5.4    | <i>P. gaboni</i>         | KT824403                  | published SGA sequence                     | 827         | n/a                    |
| GTptt604_RH5_SGA5.1    | <i>P. gaboni</i>         | KT824405                  | published SGA sequence                     | 827         | n/a                    |
| GTptt604_RH5_SGA5.3    | <i>P. gaboni</i>         | KT824406                  | published SGA sequence                     | 827         | n/a                    |
| KApts1680_RH5_SGA30.1  | <i>P. gaboni</i>         | KT824407                  | published SGA sequence                     | 827         | n/a                    |
| PgSY37                 | <i>P. gaboni</i>         | PGSY37_0424100            | published genome                           | 1562        | long                   |
| PgSY75                 | <i>P. gaboni</i>         | PGSY75_0424100            | published genome                           | 1581        | long, 1ps              |
| SYpte37_RH5_SGA5.1     | <i>P. gaboni</i>         | KT824408                  | published SGA sequence                     | 827         | n/a                    |
| SYpte57_RH5_SGA60.12   | <i>P. gaboni</i>         | (KT824408)                | published SGA sequence                     | 827         | n/a                    |
| SYpte66_FB_SGA5.1      | <i>P. gaboni</i>         | MF356545                  | updated SGA sequence with new accession    | 1242        | long                   |
| SYptt13_FB_SGA5.1      | <i>P. gaboni</i>         | KT824410                  | updated SGA sequence                       | 1252        | long                   |
| SYptt5_FB_SGA5.1       | <i>P. gaboni</i>         | KT824415                  | updated SGA sequence                       | 1226        | long                   |
| SYptt61_FB_SGA5.1      | <i>P. gaboni</i>         | MF356546                  | new SGA sequence                           | 1252        | long                   |
| SYptt61_FB_SGA5.4      | <i>P. gaboni</i>         | KT824416                  | updated SGA sequence                       | 1252        | long                   |
| SYptt61_FB_SGA5.7      | <i>P. gaboni</i>         | MF356547                  | new SGA sequence                           | 1239        | long                   |
| SYptt63_FB_SGA5.4      | <i>P. gaboni</i>         | KT824417                  | updated SGA sequence                       | 1238        | long                   |
| SYptt63_RH5_SGA60.10   | <i>P. gaboni</i>         | KT824418                  | published SGA sequence                     | 827         | n/a                    |
| SYptt65_RH5_SGA6.9     | <i>P. gaboni</i>         | KT824420                  | published SGA sequence                     | 827         | n/a                    |
| SYptt65_RH5_SGA60.1    | <i>P. gaboni</i>         | (KT824408)                | published SGA sequence                     | 827         | n/a                    |
| TCptt18_FB_SGA5.8      | <i>P. gaboni</i>         | KT824423                  | updated SGA sequence                       | 1252        | long                   |
| DSggg24_RH5_SGA6.7     | <i>P. praefalciparum</i> | KT824395                  | published SGA sequence                     | 869         | n/a                    |
| GTggg10_RH5_SGA6.4     | <i>P. praefalciparum</i> | KT824397                  | published SGA sequence                     | 848         | n/a                    |
| GTggg118_RH5_SGA10.4   | <i>P. praefalciparum</i> | KT824398                  | published SGA sequence                     | 844         | n/a                    |
| GTggg119_FB_SGA5.4     | <i>P. praefalciparum</i> | MF356549                  | new SGA sequence                           | 1290        | long                   |

|                        |                          |                |                                         |      |           |
|------------------------|--------------------------|----------------|-----------------------------------------|------|-----------|
| GTggg119_FL_SGA        | <i>P. praefalciparum</i> | MF356548       | updated SGA sequence with new accession | 1924 | long, 1ps |
| GTggg119_RH5_SGA5.8    | <i>P. praefalciparum</i> | KT824400       | published SGA sequence                  | 869  | n/a       |
| SAggg3157_FA_SGA30.A10 | <i>P. praefalciparum</i> | MF356550       | new SGA sequence                        | 1327 | n/a       |
| SAggg3157_RH5_SGA30.B7 | <i>P. praefalciparum</i> | MF356552       | new SGA sequence                        | 848  | n/a       |
| SAggg3157_RH5_SGA30.D6 | <i>P. praefalciparum</i> | MF356553       | new SGA sequence                        | 848  | n/a       |
| SAggg3157_RH5_SGA30.D7 | <i>P. praefalciparum</i> | MF356551       | new SGA sequence                        | 848  | n/a       |
| DGptt540_FB_SGA5.1     | <i>P. reichenowi</i>     | MF356554       | updated SGA sequence with new accession | 1259 | long      |
| DGptt540_FB_SGA5.5     | <i>P. reichenowi</i>     | KT824394       | updated SGA sequence                    | 1259 | long      |
| DGptt540_RH5_SGA30.1   | <i>P. reichenowi</i>     | KT824392       | published SGA sequence                  | 833  | n/a       |
| DGptt540_RH5_SGA30.10  | <i>P. reichenowi</i>     | KT824391       | published SGA sequence                  | 833  | n/a       |
| DGptt540_RH5_SGA30.3   | <i>P. reichenowi</i>     | KT824393       | published SGA sequence                  | 833  | n/a       |
| DGptt540_RH5_SGA30.4   | <i>P. reichenowi</i>     | (KT824419)     | published SGA sequence                  | 833  | n/a       |
| GTptt212_RH5_SGA5.1    | <i>P. reichenowi</i>     | KT824401       | published SGA sequence                  | 833  | n/a       |
| GTptt212_RH5_SGA5.4    | <i>P. reichenowi</i>     | KT824402       | published SGA sequence                  | 833  | n/a       |
| PrCDC                  | <i>P. reichenowi</i>     | PRCDC_0421300  | published genome                        | 1608 | long, 1ps |
| PrSY57                 | <i>P. reichenowi</i>     | PRSY57_0421300 | published genome                        | 1608 | n/a       |
| SYptt15_RH5_SGA60.5    | <i>P. reichenowi</i>     | KT824411       | published SGA sequence                  | 833  | n/a       |
| SYptt47_RH5_SGA10.5    | <i>P. reichenowi</i>     | KT824414       | published SGA sequence                  | 833  | n/a       |
| SYptt64_RH5_SGA60.5    | <i>P. reichenowi</i>     | KT824419       | published SGA sequence                  | 833  | n/a       |
| SYptt7_FB_SGA5.1       | <i>P. reichenowi</i>     | MF356555       | new SGA sequence                        | 1250 | long      |
| SYptt7_RH5_SGA60.12    | <i>P. reichenowi</i>     | KT824421       | published SGA sequence                  | 833  | n/a       |
| TCptt18_FB_SGA20.6     | <i>P. reichenowi</i>     | KT824422       | updated SGA sequence                    | 1398 | long      |
| TCptt18_RH5_SGA60.11   | <i>P. reichenowi</i>     | KT824424       | published SGA sequence                  | 833  | n/a       |
| TCptt18_RH5_SGA60.2    | <i>P. reichenowi</i>     | KT824425       | published SGA sequence                  | 833  | n/a       |

<sup>a</sup>An accession number in brackets indicates that the sample had a sequence identical to the sequence associated with the accession number, but was from a different sample than the one referred to in the database entry. It is considered an independent sequence but does not have a separate accession number.

<sup>b</sup>'long' indicates inclusion in the 'long alignment', '1ps' indicates inclusion in the 'one sequence per species' alignment. All sequences were included in the short alignment and the alignment for the tree in Fig. 3. Further details of the different alignments are given in the Methods.
