# Supplementary material for: Adaptive Evolution of RH5 in Ape Plasmodium species of the Laverania Subgenus
Source: PubMed Central journal article supplement (PMC5784257; doi:10.1128/mbio.02237-17), 2018-01-23
Supplement: mbo001183680st2.pdf [file mbo001183680st2.pdf]

**Table S2** Nonsynonymous and synonymous polymorphism and divergence across the long alignment

| Comparison                                     | P <sub>N</sub> | P <sub>S</sub> | D <sub>N</sub> | D <sub>S</sub> | DoS <sup>a</sup> | M-K <sup>b</sup> |
|------------------------------------------------|----------------|----------------|----------------|----------------|------------------|------------------|
| All ape parasite species                       | 21             | 22             | 248            | 67             | 0.299            | 0.017            |
| <i>P. falciparum</i> vs                        | 10             | 0              | 12             | 4              | -0.250           | 0.14             |
| <i>P. falciparum</i> vs <i>P. adleri</i>       | 10             | 2              | 22             | 4              | 0.013            | 1.0              |
| <i>P. falciparum</i> vs <i>P. gaboni</i>       | 19             | 8              | 51             | 20             | 0.015            | 1.0              |
| <i>P. praefalciparum</i> vs <i>P. adleri</i>   | 2              | 2              | 20             | 6              | 0.269            | 0.28             |
| <i>P. praefalciparum</i> vs <i>P. gaboni</i>   | 11             | 8              | 51             | 19             | 0.150            | 0.26             |
| <i>P. adleri</i> vs <i>P. gaboni</i>           | 11             | 10             | 56             | 18             | 0.233            | 0.06             |
| <i>P. reichenowi</i> vs <i>P. billcollinsi</i> | 9              | 12             | 101            | 26             | 0.367            | <0.001           |

<sup>a</sup>DoS calculated as  $D_N/(D_N+D_S) - P_N/(P_N+P_S)$  (34).

<sup>b</sup>P values from the M-K test (23) in a Fisher exact test.
